# Supplementary material
Source: PubMed Central journal article supplement (PMC4793630)
Supplement: croe014536.ww1_default.pdf [file croe014536.ww1_default.pdf]

**Supplementary Table 1 Comparison of characteristics of cases and controls, 1 April 2007 to 31 March 2011, secondary analysis**

|                                                | Categories                                       | Controls        | Other cases     | High grade cases |
|------------------------------------------------|--------------------------------------------------|-----------------|-----------------|------------------|
|                                                |                                                  | No (%)          | No (%)          | No (%)           |
| <b>Agegroup*</b>                               | 11 to <15yrs in 2007                             | 127 (1)         | 32 (1)          | 5 (1)            |
|                                                | 15 to <19yrs in 2007                             | 4350 (28)       | 909 (38)        | 225 (26)         |
|                                                | 19 to <23yrs in 2007                             | 6155 (40)       | 993 (42)        | 408 (46)         |
|                                                | 23 to <28yrs in 2007                             | 4731 (31)       | 447 (19)        | 243 (28)         |
| <b>Socioeconomic quintile</b>                  | 1 (Most disadvantaged)                           | 1756 (11)       | 289 (12)        | 113 (13)         |
|                                                | 2                                                | 2798 (18)       | 415 (17)        | 173 (20)         |
|                                                | 3                                                | 3810 (25)       | 588 (25)        | 214 (24)         |
|                                                | 4                                                | 3997 (26)       | 647 (27)        | 215 (24)         |
|                                                | 5 (Least disadvantaged)                          | 3002 (20)       | 442 (19)        | 166 (19)         |
| <b>Remoteness category</b>                     | Major Cities of Australia                        | 10298 (67)      | 1563 (66)       | 550 (62)         |
|                                                | Inner Regional Australia                         | 2575 (17)       | 380 (16)        | 157 (18)         |
|                                                | Outer Regional Australia                         | 2219 (14)       | 374 (16)        | 147 (17)         |
|                                                | Remote/Very Remote Australia                     | 271 (2)         | 64 (3)          | 27 (3)           |
| <b>Tests before index date</b>                 | Tests=1                                          | 14223 (93)      | 2124 (89)       | 603 (68)         |
|                                                | Tests=2                                          | 1053 (7)        | 236 (10)        | 193 (22)         |
|                                                | Tests=3                                          | 83 (1)          | 19 (1)          | 66 (7)           |
|                                                | Tests=4                                          | 4 (0.03)        | 2 (0.1)         | 18 (2)           |
|                                                | Tests=5                                          | 0               | 0               | 1 (0.1)          |
| <b>Follow up periods**</b>                     | Time from start of study to index date           | 1142 (921-1306) | 1101 (876-1290) | 984 (711-1194)   |
|                                                | Time from study start date to first vaccine dose | 229 (173-382)   | 229 (142-387)   | 242 (185-421)    |
|                                                | Time from study start date to last vaccine dose  | 414 (317-600)   | 409 (298-600)   | 433 (330-624)    |
|                                                | Time from first vaccine dose to index date       | 824 (626-1042)  | 806 (565-1039)  | 650 (377-912)    |
|                                                | Time from last vaccine dose to index date        | 638 (436-862)   | 626 (368-854)   | 471 (217-701)    |
| <b>Follow up quartile (time to index date)</b> | 1 (between 0 and 906 days)                       | 3605 (23)       | 678 (28)        | 384 (44)         |
|                                                | 2 (between 906 and 1131 days)                    | 3872 (25)       | 592 (25)        | 213 (24)         |
|                                                | 3 (between 1131 and 1300 days)                   | 3924 (26)       | 551 (23)        | 182 (21)         |
|                                                | 4 (greater than 1300 days)                       | 2962 (26)       | 560 (24)        | 102 (12)         |

\* Australian Bureau of Statistics estimated resident populations for Queensland women in 2007 were 111,805 (11 to <15 years), 112,250 (15 to <19 years), 113,920 (19 to <23 Years) and 142,836 (23 to <28 years)

\*\* Median time in days (lower quartile, upper quartile)

**Supplementary Table 2 Frequency of cytological and histological diagnoses for cases, 1 April 2007 to 31 March 2011, secondary analysis**

| Case group                         | Category of cervical abnormality¶                               | Diagnosis                                                              | N (%)               |
|------------------------------------|-----------------------------------------------------------------|------------------------------------------------------------------------|---------------------|
|                                    | <b>Histologically confirmed high-grade cervical abnormality</b> |                                                                        | <b>881 (100)</b>    |
| <b>High grade cases§<br/>N=881</b> | Squamous abnormalities                                          | Cervical intraepithelial neoplasia (CIN) 3                             | 724 (82)            |
|                                    |                                                                 | Cervical intraepithelial neoplasia (CIN) 2                             | 124 (14)            |
|                                    |                                                                 | Cervical intraepithelial neoplasia (CIN) not otherwise specified (NOS) | 20 (2)              |
|                                    | Endocervical abnormalities                                      | Adenocarcinoma, invasive                                               | 1 (0.1)             |
|                                    |                                                                 | Adenocarcinoma <i>in situ</i> (AIS)                                    | 12 (1)              |
|                                    | <b>Histologically confirmed low-grade abnormality</b>           |                                                                        | <b>183 (7.7)</b>    |
| <b>Other cases<br/>N=2,381</b>     | Squamous abnormalities                                          | Low grade squamous abnormality                                         | 183 (7.7)           |
|                                    | <b>Cytological abnormality only</b>                             |                                                                        | <b>2,198 (92.3)</b> |
|                                    | Cytological squamous abnormalities                              | High grade squamous intraepithelial lesion (HSIL)                      | 87 (3.7)            |
|                                    |                                                                 | Possible high grade squamous intraepithelial lesion (pHSIL)            | 82 (3.4)            |
|                                    |                                                                 | Low grade squamous intraepithelial lesion (LSIL)                       | 1,000 (42.0)        |
|                                    |                                                                 | Possible low grade squamous intraepithelial lesion (pLSIL)             | 1,025 (43.0)        |
|                                    | Cytological endocervical abnormalitiesΨ                         | Possible high grade endocervical abnormality                           | 2 (0.08)            |
|                                    |                                                                 | Atypical endocervical cells of unknown significance                    | 2 (0.08)            |

¶ Histology and cytology reporting categories of the Australian National Cervical Screening Program. The Australian modified Bethesda System 2004 designates ASC-US as pLSIL and ASC-H as pHSIL

§ Index date for high grade cases is the date of the cytology test immediately preceding the histology test

Ψ 1 'other' case had mixed squamous and endocervical abnormalities and was classified according to the endocervical component: possible high grade endocervical abnormality (also had HSIL)

**Supplementary Table 3 Effectiveness of quadrivalent HPV vaccine by number of doses, stratified by age in 2007, secondary analysis**

| Age in 2007            | Doses | Controls     |              | Other cases         |                     | No/total (%) | High grade cases    |                     |
|------------------------|-------|--------------|--------------|---------------------|---------------------|--------------|---------------------|---------------------|
|                        |       | No/total (%) | No/total (%) | OR Crude            | OR Adjusted*        |              | OR Crude            | OR Adjusted*        |
| <b>11 to &lt;15yrs</b> |       |              |              |                     |                     |              |                     |                     |
|                        | 0     | 15 (12)      | 4 (13)       | reference           | reference           | 2 (40)       | reference           | reference           |
|                        | 1     | 9 (7)        | 1 (3)        | 0.42 (0.04 to 4.33) | 0.56 (0.05 to 6.92) | 0            | -                   | -                   |
|                        | 2     | 17 (13)      | 11 (34)      | 2.43 (0.64 to 9.25) | 2.02 (0.49 to 8.37) | 1 (20)       | 0.44 (0.04 to 5.37) | -                   |
|                        | 3     | 86 (68)      | 16 (50)      | 0.70 (0.21 to 2.38) | 0.60 (0.16 to 2.31) | 2 (20)       | 0.17 (0.02 to 1.34) | -                   |
| <b>15 to &lt;19yrs</b> |       |              |              |                     |                     |              |                     |                     |
|                        | 0     | 649 (15)     | 168 (18)     | reference           | reference           | 41 (18)      | reference           | reference           |
|                        | 1     | 354 (8)      | 75 (8)       | 0.82 (0.61 to 1.11) | 0.83 (0.61 to 1.12) | 34 (15)      | 1.52 (0.95 to 2.44) | 1.38 (0.85 to 2.22) |
|                        | 2     | 790 (18)     | 166 (18)     | 0.81 (0.64 to 1.03) | 0.82 (0.65 to 1.04) | 45 (20)      | 0.90 (0.58 to 1.39) | 0.88 (0.61 to 1.12) |
|                        | 3     | 2557 (59)    | 500 (55)     | 0.76 (0.62 to 0.92) | 0.75 (0.61 to 0.91) | 105 (47)     | 0.65 (0.45 to 0.94) | 0.71 (0.49 to 1.04) |
| <b>19 to &lt;23yrs</b> |       |              |              |                     |                     |              |                     |                     |
|                        | 0     | 1566 (25)    | 266 (27)     | reference           | reference           | 134 (33)     | reference           | reference           |
|                        | 1     | 756 (12)     | 135 (14)     | 1.05 (0.84 to 1.32) | 0.99 (0.79 to 1.24) | 53 (13)      | 0.82 (0.59 to 1.14) | 0.78 (0.56 to 1.09) |
|                        | 2     | 1546 (25)    | 244 (24)     | 0.93 (0.77 to 1.12) | 0.91 (0.75 to 1.10) | 82 (20)      | 0.62 (0.47 to 0.82) | 0.62 (0.47 to 0.83) |
|                        | 3     | 2287 (37)    | 248 (35)     | 0.9 (0.75 to 1.06)  | 0.9 (0.76 to 1.08)  | 139 (34)     | 0.71 (0.56 to 0.91) | 0.79 (0.61 to 1.01) |
| <b>23 to &lt;28yrs</b> |       |              |              |                     |                     |              |                     |                     |
|                        | 0     | 2226 (47)    | 226 (51)     | reference           | reference           | 112 (46)     | reference           | reference           |
|                        | 1     | 453 (10)     | 46 (10)      | 1.0 (0.72 to 1.40)  | 0.90 (0.64 to 1.26) | 32 (13)      | 1.40 (0.94 to 2.10) | 1.21 (0.80 to 1.83) |
|                        | 2     | 824 (17)     | 81 (18)      | 0.97 (0.74 to 1.26) | 0.89 (0.67 to 1.16) | 51 (21)      | 1.23 (0.88 to 1.73) | 1.13 (0.8 to 1.60)  |
|                        | 3     | 1228 (26)    | 94 (21)      | 0.75 (0.59 to 0.97) | 0.72 (0.55 to 1.13) | 48 (20)      | 0.78 (0.55 to 1.10) | 0.79 (0.55 to 0.93) |
| <b>All ages</b>        |       |              |              |                     |                     |              |                     |                     |
|                        | 0     | 4456 (29)    | 664 (28)     | reference           | reference           | 289 (33)     | reference           | reference           |
|                        | 1     | 1572 (10)    | 257 (11)     | 1.1 (0.94 to 1.28)  | 0.91 (0.78 to 1.07) | 119 (14)     | 1.17 (0.94 to 1.46) | 1.01 (0.80 to 1.24) |
|                        | 2     | 3177 (21)    | 502 (21)     | 1.06 (0.94 to 1.28) | 0.88 (0.78 to 1.00) | 179 (20)     | 0.87 (0.72 to 1.05) | 0.80 (0.78 to 1.00) |
|                        | 3     | 6158 (40)    | 958 (40)     | 1.04 (0.94 to 1.16) | 0.81 (0.72 to 0.91) | 294 (33)     | 0.74 (0.62 to 0.87) | 0.77 (0.64 to 0.92) |

\* Adjusted for socio-economic status, rurality, year of birth, quartile of follow-up times

**Supplementary Table 4 Effectiveness of quadrivalent HPV vaccine by number of doses, stratified by age in 2007, where time between last vaccine dose and index date >30 days, primary analysis**

\* Adjusted for socio-economic status, rurality, year of birth, quartile of follow-up times

| Age in 2007            | Doses | Controls     |              | Other cases         |                     | High grade cases |                     |                     |
|------------------------|-------|--------------|--------------|---------------------|---------------------|------------------|---------------------|---------------------|
|                        |       | No/total (%) | No/total (%) | OR Crude            | OR Adjusted*        | No/total (%)     | OR Crude            | OR Adjusted*        |
| <b>11 to &lt;15yrs</b> |       |              |              |                     |                     |                  |                     |                     |
|                        | 0     | 619 (25)     | 102 (36)     | reference           | reference           | 4 (31)           | reference           | reference           |
|                        | 1     | 154 (6)      | 21 (7)       | 0.83 (0.50 to 1.37) | 0.84 (0.50 to 1.39) | 3 (23)           | 3.02 (0.67 to 13.6) | 2.9 (0.62 to 13.6)  |
|                        | 2     | 317 (13)     | 35 (12)      | 0.67 (0.45 to 1.01) | 0.67 (0.44 to 1.01) | 0                | -                   | -                   |
|                        | 3     | 1394 (56)    | 126 (44)     | 0.55 (0.42 to 0.72) | 0.59 (0.44 to 0.78) | 6 (46)           | 0.67 (0.19 to 2.37) | 0.75 (0.20 to 2.81) |
| <b>15 to &lt;19yrs</b> |       |              |              |                     |                     |                  |                     |                     |
|                        | 0     | 9918 (32)    | 1666 (43)    | reference           | reference           | 101 (51)         | reference           | reference           |
|                        | 1     | 2099 (7)     | 349 (9)      | 0.99 (0.87 to 1.12) | 0.99 (0.88 to 1.13) | 14 (7)           | 0.66 (0.37 to 1.15) | 0.68 (0.39 to 1.20) |
|                        | 2     | 3894 (13)    | 483 (12)     | 0.74 (0.66 to 0.82) | 0.78 (0.70 to 0.87) | 26 (13)          | 0.66 (0.43 to 1.01) | 0.70 (0.45 to 1.08) |
|                        | 3     | 15092 (49)   | 1421 (36)    | 0.56 (0.52 to 0.60) | 0.63 (0.58 to 0.69) | 58 (29)          | 0.38 (0.27 to 0.52) | 0.43 (0.30 to 0.61) |
| <b>19 to &lt;23yrs</b> |       |              |              |                     |                     |                  |                     |                     |
|                        | 0     | 20896 (66)   | 2891 (74)    | reference           | reference           | 306 (75)         | reference           | reference           |
|                        | 1     | 3125 (10)    | 413 (11)     | 0.96 (0.86 to 1.07) | 1.02 (0.92 to 1.14) | 35 (9)           | 0.77 (0.54 to 1.09) | 0.76 (0.53 to 1.08) |
|                        | 2     | 3782 (12)    | 342 (9)      | 0.65 (0.58 to 0.74) | 0.77 (0.68 to 0.87) | 39 (10)          | 0.70 (0.50 to 0.98) | 0.70 (0.50 to 0.99) |
|                        | 3     | 3934 (12)    | 284 (7)      | 0.52 (0.46 to 0.59) | 0.68 (0.60 to 0.78) | 27 (7)           | 0.47 (0.32 to 0.70) | 0.47 (0.31 to 0.70) |
| <b>23 to &lt;28yrs</b> |       |              |              |                     |                     |                  |                     |                     |
|                        | 0     | 21599 (80)   | 1862 (84)    | reference           | reference           | 318 (80)         | reference           | reference           |
|                        | 1     | 1833 (7)     | 133 (6)      | 0.84 (0.70 to 1.01) | 0.84 (0.7 to 1.01)  | 34 (9)           | 1.26 (0.88 to 1.8)  | 1.38 (0.96 to 1.98) |
|                        | 2     | 1824 (7)     | 123 (6)      | 0.78 (0.65 to 0.95) | 0.85 (0.70 to 1.02) | 23 (6)           | 0.86 (0.56 to 1.31) | 0.94 (0.61 to 1.45) |
|                        | 3     | 1863 (7)     | 100 (4)      | 0.62 (0.51 to 0.77) | 0.73 (0.59 to 0.90) | 22 (5)           | 0.80 (0.52 to 1.24) | 0.90 (0.58 to 1.41) |
| <b>All ages</b>        |       |              |              |                     |                     |                  |                     |                     |
|                        | 0     | 53032 (57)   | 6521 (63)    | reference           | reference           | 729 (72)         | reference           | reference           |
|                        | 1     | 7211 (8)     | 916 (9)      | 1.03 (0.96 to 1.11) | 0.97 (0.90 to 1.05) | 86 (8)           | 0.87 (0.69 to 1.09) | 0.96 (0.76 to 1.20) |
|                        | 2     | 9817 (11)    | 983 (9)      | 0.81 (0.76 to 0.87) | 0.78 (0.72 to 0.84) | 88 (9)           | 0.65 (0.52 to 0.81) | 0.77 (0.62 to 0.97) |
|                        | 3     | 22283 (24)   | 1931 (19)    | 0.71 (0.67 to 0.74) | 0.65 (0.61 to 0.69) | 113 (11)         | 0.37 (0.30 to 0.45) | 0.54 (0.43 to 0.67) |

**Supplementary Table 5 Effectiveness of quadrivalent HPV vaccine by number of doses, stratified by age in 2007, where time between last vaccine dose and index date >180 days, primary analysis**

| Age in 2007            | Doses | Controls     |              | Other cases         |                     | No/total (%) | High grade cases    |                     |
|------------------------|-------|--------------|--------------|---------------------|---------------------|--------------|---------------------|---------------------|
|                        |       | No/total (%) | No/total (%) | OR Crude            | OR Adjusted*        |              | OR Crude            | OR Adjusted*        |
| <b>11 to &lt;15yrs</b> |       |              |              |                     |                     |              |                     |                     |
|                        | 0     | 619 (27)     | 102 (39)     | reference           | reference           | 4 (36)       | reference           | reference           |
|                        | 1     | 134 (6)      | 18 (7)       | 0.82 (0.48 to 1.39) | 0.86 (0.50 to 1.48) | 3 (27)       | 3.47 (0.77 to 15.7) | 3.8 (0.77 to 18.7)  |
|                        | 2     | 273 (12)     | 29 (11)      | 0.65 (0.42 to 1.00) | 0.70 (0.45 to 1.09) | 0            | -                   | -                   |
|                        | 3     | 1295 (56)    | 113 (43)     | 0.53 (0.40 to 0.70) | 0.59 (0.43 to 0.80) | 4 (36)       | 0.48 (0.12 to 1.92) | 0.54 (0.12 to 2.39) |
| <b>15 to &lt;19yrs</b> |       |              |              |                     |                     |              |                     |                     |
|                        | 0     | 9918 (35)    | 1666 (48)    | reference           | reference           | 101 (55)     | reference           | reference           |
|                        | 1     | 1390 (5)     | 198 (6)      | 0.85 (0.72 to 0.99) | 0.94 (0.80 to 1.10) | 10 (5)       | 0.71 (0.37 to 1.36) | 0.73 (0.38 to 1.41) |
|                        | 2     | 2932 (10)    | 332 (10)     | 0.67 (0.60 to 0.76) | 0.76 (0.67 to 0.87) | 19 (10)      | 0.64 (0.39 to 1.04) | 0.66 (0.40 to 1.10) |
|                        | 3     | 14086 (50)   | 1285 (8)     | 0.54 (0.50 to 0.59) | 0.62 (0.57 to 0.68) | 53 (29)      | 0.37 (0.27 to 0.52) | 0.42 (0.29 to 0.60) |
| <b>19 to &lt;23yrs</b> |       |              |              |                     |                     |              |                     |                     |
|                        | 0     | 20896 (74)   | 2891 (84)    | reference           | reference           | 306 (83)     | reference           | reference           |
|                        | 1     | 1752 (6)     | 175 (5)      | 0.72 (0.62 to 0.85) | 0.90 (0.76 to 1.06) | 16 (4)       | 0.62 (0.38 to 1.03) | 0.59 (0.35 to 0.98) |
|                        | 2     | 2461 (9)     | 176 (5)      | 0.52 (0.44 to 0.61) | 0.66 (0.56 to 0.78) | 25 (7)       | 0.69 (0.46 to 1.05) | 0.68 (0.45 to 1.04) |
|                        | 3     | 3089 (11)    | 205 (6)      | 0.48 (0.41 to 0.56) | 0.63 (0.54 to 0.74) | 23 (6)       | 0.51 (0.33 to 0.78) | 0.50 (0.32 to 0.78) |
| <b>23 to &lt;28yrs</b> |       |              |              |                     |                     |              |                     |                     |
|                        | 0     | 21599 (85)   | 1862 (90)    | reference           | reference           | 318 (87)     | reference           | reference           |
|                        | 1     | 1041 (4)     | 71 (3)       | 0.79 (0.62 to 1.01) | 0.90 (0.70 to 1.15) | 19 (5)       | 1.24 (0.78 to 1.98) | 1.38 (0.86 to 2.21) |
|                        | 2     | 1199 (5)     | 70 (3)       | 0.68 (0.53 to 0.87) | 0.82 (0.64 to 1.05) | 12 (3)       | 0.68 (0.38 to 1.21) | 0.75 (0.42 to 1.34) |
|                        | 3     | 1456 (6)     | 75 (4)       | 0.60 (0.47 to 0.76) | 0.73 (0.57 to 0.92) | 16 (5)       | 0.75 (0.45 to 1.24) | 0.81 (0.49 to 1.36) |
| <b>All ages</b>        |       |              |              |                     |                     |              |                     |                     |
|                        | 0     | 53032 (63)   | 6521 (70)    | reference           | reference           | 729 (78)     | reference           | reference           |
|                        | 1     | 4317 (5)     | 462 (5)      | 0.87 (0.79 to 0.96) | 0.91 (0.82 to 1.01) | 48 (5)       | 0.81 (0.60 to 1.09) | 0.89 (0.66 to 1.20) |
|                        | 2     | 6865 (8)     | 607 (7)      | 0.72 (0.66 to 0.78) | 0.73 (0.67 to 0.80) | 56 (6)       | 0.59 (0.45 to 0.78) | 0.70 (0.53 to 0.93) |
|                        | 3     | 19926 (24)   | 1678 (18)    | 0.69 (0.65 to 0.72) | 0.63 (0.59 to 0.68) | 96 (10)      | 0.35 (0.65 to 0.72) | 0.51 (0.40 to 0.65) |

\* Adjusted for socio-economic status, rurality, year of birth, quartile of follow-up times

**Supplementary Table 6 Effectiveness of quadrivalent HPV vaccine by number of doses, stratified by age in 2007, where time between last vaccine dose and index date >365 days, primary analysis**

| Age in 2007            | Doses | Controls     |              | Other cases         | OR                  | No/total (%) | High grade cases    | OR                  |
|------------------------|-------|--------------|--------------|---------------------|---------------------|--------------|---------------------|---------------------|
|                        |       | No/total (%) | No/total (%) | Crude               | Adjusted*           |              | Crude               | Adjusted*           |
| <b>11 to &lt;15yrs</b> |       |              |              |                     |                     |              |                     |                     |
|                        | 0     | 619 (30)     | 102 (43)     | reference           | reference           | 4 (40)       | reference           | reference           |
|                        | 1     | 109 (5)      | 14 (6)       | 0.78 (0.43 to 1.41) | 0.80 (0.44 to 1.47) | 3 (30)       | 0.43 (0.94 to 19.3) | 5.79 (1.06 to 31.5) |
|                        | 2     | 225 (11)     | 22 (9)       | 0.59 (0.37 to 0.96) | 0.63 (0.38 to 1.04) | 0            | -                   | -                   |
|                        | 3     | 1114 (54)    | 99 (42)      | 0.54 (0.40 to 0.72) | 0.62 (0.45 to 0.86) | 3 (30)       | 0.42 (0.40 to 0.72) | 0.52 (0.10 to 2.87) |
| <b>15 to &lt;19yrs</b> |       |              |              |                     |                     |              |                     |                     |
|                        | 0     | 9918 (39)    | 1666 (53)    | reference           | reference           | 101 (59)     | reference           | reference           |
|                        | 1     | 1043 (4)     | 133 (4)      | 0.76 (0.63 to 0.92) | 0.87 (0.72 to 1.06) | 8 (5)        | 0.75 (0.37 to 1.55) | 0.78 (0.38 to 1.63) |
|                        | 2     | 2361 (9)     | 243 (8)      | 0.61 (0.53 to 0.71) | 0.70 (0.61 to 0.82) | 14 (8)       | 0.58 (0.33 to 1.02) | 0.61 (0.34 to 1.09) |
|                        | 3     | 12368 (48)   | 1077 (35)    | 0.52 (0.48 to 0.56) | 0.59 (0.54 to 0.65) | 49 (28)      | 0.39 (0.28 to 0.55) | 0.45 (0.31 to 0.66) |
| <b>19 to &lt;23yrs</b> |       |              |              |                     |                     |              |                     |                     |
|                        | 0     | 20896 (81)   | 2891 (90)    | reference           | reference           | 306 (88)     | reference           | reference           |
|                        | 1     | 1149 (5)     | 95 (3)       | 0.60 (0.48 to 0.74) | 0.79 (0.64 to 0.98) | 9 (3)        | 0.54 (0.28 to 1.04) | 0.49 (0.25 to 0.96) |
|                        | 2     | 1694 (6)     | 110 (3)      | 0.50 (0.41 to 1.13) | 0.65 (0.53 to 0.80) | 16 (5)       | 0.68 (0.41 to 1.13) | 0.64 (0.38 to 1.07) |
|                        | 3     | 2004 (8)     | 121 (4)      | 0.44 (0.36 to 0.53) | 0.59 (0.48 to 0.72) | 17 (5)       | 0.58 (0.36 to 0.95) | 0.56 (0.34 to 0.93) |
| <b>23 to &lt;28yrs</b> |       |              |              |                     |                     |              |                     |                     |
|                        | 0     | 21599 (90)   | 1862 (93)    | reference           | reference           | 318 (90)     | reference           | reference           |
|                        | 1     | 707 (3)      | 50 (2)       | 0.82 (0.61 to 1.10) | 0.98 (0.73 to 1.31) | 13 (4)       | 1.25 (0.71 to 2.19) | 1.37 (0.78 to 2.43) |
|                        | 2     | 802 (3)      | 34 (2)       | 0.49 (0.35 to 0.70) | 0.60 (0.43 to 0.86) | 10 (3)       | 0.85 (0.45 to 1.60) | 0.90 (0.47 to 1.71) |
|                        | 3     | 924 (4)      | 52 (3)       | 0.65 (0.49 to 0.87) | 0.81 (0.60 to 1.08) | 11 (3)       | 0.81 (0.44 to 1.48) | 0.85 (0.46 to 1.58) |
| <b>All ages</b>        |       |              |              |                     |                     |              |                     |                     |
|                        | 0     | 53032 (69)   | 6521 (76)    | reference           | reference           |              | reference           | reference           |
|                        | 1     | 3008 (4)     | 292 (3)      | 0.79 (0.70 to 0.89) | 0.86 (0.76 to 0.98) | 729 (83)     | 0.80 (0.56 to 1.13) | 0.87 (0.61 to 1.24) |
|                        | 2     | 4992 (6)     | 409 (5)      | 0.67 (0.60 to 0.74) | 0.68 (0.61 to 0.76) | 33 (4)       | 0.58 (0.42 to 0.80) | 0.69 (0.49 to 0.95) |
|                        | 3     | 16410 (21)   | 1349 (16)    | 0.67 (0.63 to 0.71) | 0.61 (0.56 to 0.65) | 40 (4)       | 0.36 (0.28 to 0.45) | 0.53 (0.40 to 0.93) |

\* Adjusted for socio-economic status, rurality, year of birth, quartile of follow-up times

**Supplementary Table 7 Effectiveness of quadrivalent HPV vaccine by number of doses, stratified by age in 2007, using provider assigned dose numbers to assign exposure status, primary analysis**

| Age in 2007            | Controls |              | Other cases<br>OR<br>Crude | OR<br>Adjusted*     | No/total<br>(%)     | High grade cases |                     |                     |
|------------------------|----------|--------------|----------------------------|---------------------|---------------------|------------------|---------------------|---------------------|
|                        | Doses    | No/total (%) |                            |                     |                     | OR<br>Crude      | OR<br>Adjusted*     |                     |
| <b>11 to &lt;15yrs</b> |          |              |                            |                     |                     |                  |                     |                     |
|                        | 0        | 619 (24)     | 102 (35)                   | reference           | reference           | 4 (31)           | reference           | reference           |
|                        | 1        | 140 (6)      | 19 (7)                     | 0.82 (0.49 to 1.39) | 0.79 (0.47 to 1.35) | 3 (23)           | 3.32 (0.73 to 14.9) | 3.15 (0.67 to 14.8) |
|                        | 2        | 282 (11)     | 33 (11)                    | 0.71 (0.47 to 1.08) | 0.71 (0.46 to 1.08) | 0                | -                   | -                   |
|                        | 3        | 1484 (59)    | 137 (47)                   | 0.56 (0.43 to 0.74) | 0.61 (0.46 to 0.81) | 6 (46)           | 0.63 (0.18 to 2.23) | 0.66 (0.18 to 2.46) |
| Total                  |          | 2525         | 291                        |                     |                     | 13               |                     |                     |
| <b>15 to &lt;19yrs</b> |          |              |                            |                     |                     |                  |                     |                     |
|                        | 0        | 9918 (31)    | 1666 (41)                  | reference           | reference           | 101 (47)         | reference           | reference           |
|                        | 1        | 1958 (6)     | 358 (9)                    | 1.09 (0.96 to 1.23) | 1.04 (0.92 to 1.35) | 18 (9)           | 0.90 (0.55 to 1.49) | 0.92 (0.56 to 1.53) |
|                        | 2        | 3221 (10)    | 450 (11)                   | 0.83 (0.74 to 0.93) | 0.84 (0.75 to 0.94) | 27 (13)          | 0.82 (0.54 to 1.26) | 0.88 (0.57 to 1.35) |
|                        | 3        | 16947 (53)   | 1626 (40)                  | 0.57 (0.53 to 0.61) | 0.64 (0.59 to 0.70) | 67 (31)          | 0.39 (0.29 to 0.53) | 0.44 (0.32 to 0.62) |
| Total                  |          | 32044        | 4100                       |                     |                     | 213              |                     |                     |
| <b>19 to &lt;23yrs</b> |          |              |                            |                     |                     |                  |                     |                     |
|                        | 0        | 20896 (62)   | 2891 (69)                  | reference           | reference           | 306 (72)         | reference           | reference           |
|                        | 1        | 2911 (9)     | 423 (10)                   | 1.05 (0.94 to 1.17) | 1.03 (0.92 to 1.15) | 34 (8)           | 0.80 (0.56 to 1.14) | 0.81 (0.56 to 1.15) |
|                        | 2        | 3170 (9)     | 372 (9)                    | 0.85 (0.76 to 0.95) | 0.90 (0.81 to 1.02) | 33 (8)           | 0.71 (0.50 to 1.02) | 0.71 (0.50 to 1.03) |
|                        | 3        | 6591 (20)    | 501 (12)                   | 0.55 (0.50 to 0.61) | 0.69 (0.62 to 0.77) | 50 (12)          | 0.52 (0.38 to 0.70) | 0.51 (0.38 to 0.70) |
| Total                  |          | 33568        | 4187                       |                     |                     | 423              |                     |                     |
| <b>23 to &lt;28yrs</b> |          |              |                            |                     |                     |                  |                     |                     |
|                        | 0        | 21599 (76)   | 1862 (81)                  | reference           | reference           | 318 (77)         | reference           | reference           |
|                        | 1        | 1732 (6)     | 134 (6)                    | 0.90 (0.75 to 1.08) | 0.81 (0.67 to 0.97) | 31 (8)           | 1.22 (0.84, 1.76)   | 1.32 (0.90 to 1.92) |
|                        | 2        | 1606 (6)     | 117 (5)                    | 0.85 (0.70 to 1.03) | 0.83 (0.68 to 1.01) | 22 (5)           | 0.93 (0.60, 1.44)   | 1.00 (0.65 to 1.56) |
|                        | 3        | 3330 (12)    | 196 (8)                    | 0.68 (0.59 to 0.80) | 0.78 (0.67 to 0.92) | 42 (10)          | 0.86 (0.62, 1.18)   | 0.96 (0.69 to 1.34) |
| Total                  |          | 28267        | 2309                       |                     |                     | 413              |                     |                     |
| <b>All ages</b>        |          |              |                            |                     |                     |                  |                     |                     |
|                        | 0        | 53032 (55)   | 6521 (60)                  | reference           | reference           | 729 (69)         | reference           | reference           |
|                        | 1        | 6741 (7)     | 934 (9)                    | 1.13 (1.05 to 1.21) | 0.99 (0.92 to 1.06) | 86 (8)           | 0.93 (0.74 to 1.16) | 1.03 (0.82 to 1.29) |
|                        | 2        | 8279 (9)     | 972 (9)                    | 0.96 (0.89 to 1.03) | 0.86 (0.80 to 0.92) | 82 (8)           | 0.72 (0.57 to 0.91) | 0.85 (0.68 to 1.08) |
|                        | 3        | 28352 (29)   | 2460 (23)                  | 0.71 (0.67 to 0.74) | 0.67 (0.63 to 0.71) | 165 (16)         | 0.42 (0.36 to 0.50) | 0.58 (0.48 to 0.70) |
| Total                  |          | 96404        | 10887                      |                     |                     | 1062             |                     |                     |

\* Adjusted for socio-economic status, rurality, year of birth, quartile of follow-up times
