# Supplementary material
Source: PubMed Central journal article supplement (PMC4793630)

Supplementary Figure 1: eligibility and exclusions, secondary analysis

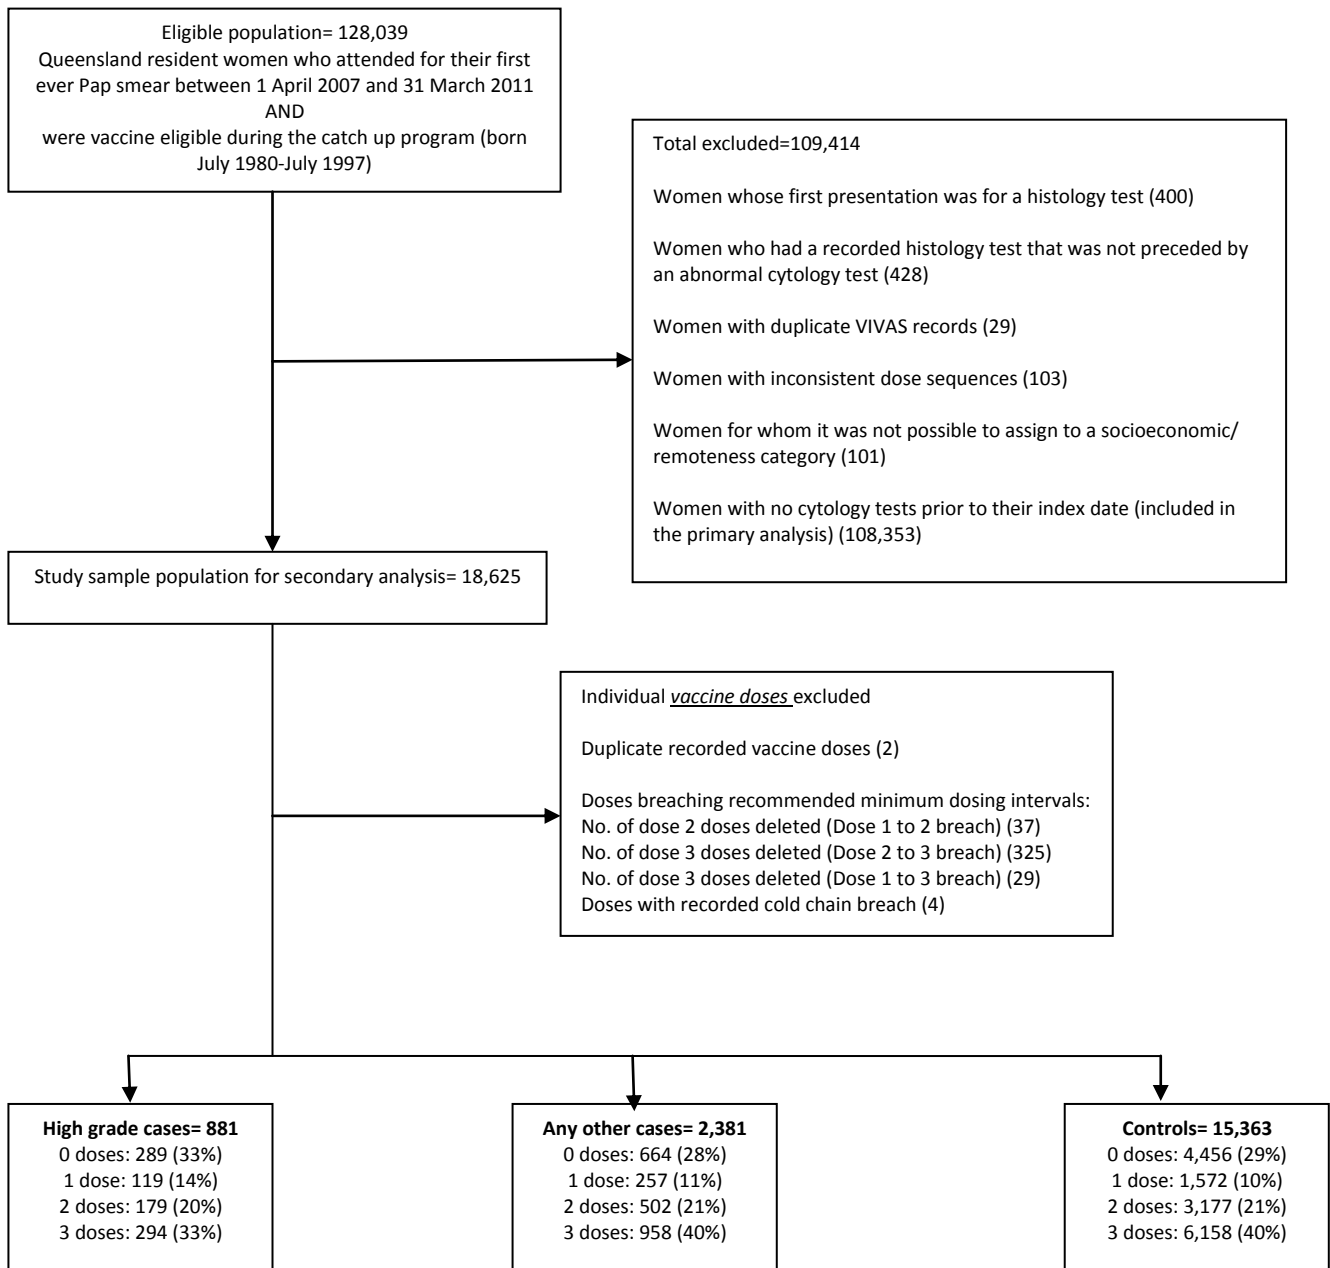

Supplement: croe014536.wf1_default.pdf [file croe014536.wf1_default.pdf]
